# Supplementary material for: The Association between Grazing and Food Addiction: The Italian Version of the Repetitive Eating Questionnaire (Rep(Eat)-Q) and Its Relationships with Food Addiction Criteria
Source: MDPI journal article supplement (doi:10.3390/nu16070949), 2024-03-26
Supplement: s1 [file s1]

# Repetitive Eating Questionnaire (Rep(Eat)-Q)

## **ISTRUZIONI:**

La preghiamo di **rispondere a tutte le domande** ponendo un **segno in corrispondenza del valore numerico** – compreso tra **0 (MAI)** e **6 (OGNI GIORNO)** – che meglio rappresenta **quanto spesso, nelle ultime 4 settimane, ha agito i seguenti comportamenti o abitudini.**

Il termine “SPILUCCARE” indica: **mangiare** ripetutamente **piccole** – o **modeste** – **quantità di cibo**, al di **fuori dei pasti previsti/programmati** dal proprio regime dietetico.

| 0   | 1         | 2               | 3            | 4            | 5                             | 6           |
|-----|-----------|-----------------|--------------|--------------|-------------------------------|-------------|
| MAI | RARAMENTE | OCCASIONALMENTE | POCHI GIORNI | MOLTI GIORNI | LA MAGGIOR<br>PATE DEI GIORNI | OGNI GIORNO |

### **Nelle ultime 4 settimane:**

|    |                                                                                                                                    |   |   |   |   |   |   |   |
|----|------------------------------------------------------------------------------------------------------------------------------------|---|---|---|---|---|---|---|
| 1  | Ha mangiato tutto il giorno <b>in maniera intermittente, senza averlo programmato.</b>                                             | 0 | 1 | 2 | 3 | 4 | 5 | 6 |
| 2  | Ha mangiato <b>ripetutamente</b> piccole o modeste quantità di cibo tra un pasto e l'altro, <b>senza averlo programmato prima.</b> | 0 | 1 | 2 | 3 | 4 | 5 | 6 |
| 3  | Ha spiluccato <b>senza badare a ciò che stava facendo.</b>                                                                         | 0 | 1 | 2 | 3 | 4 | 5 | 6 |
| 4  | Ha spiluccato <b>ripetutamente, durante tutto il giorno</b> , tra un pasto e l'altro.                                              | 0 | 1 | 2 | 3 | 4 | 5 | 6 |
| 5  | Non voleva mangiare, ma sentiva che <b>non poteva evitare di farlo.</b>                                                            | 0 | 1 | 2 | 3 | 4 | 5 | 6 |
| 6  | <b>Non è riuscito/a a resistere</b> dallo spiluccare anche se aveva provato a non farlo.                                           | 0 | 1 | 2 | 3 | 4 | 5 | 6 |
| 7  | <b>Ha fatto fatica a controllare il desiderio</b> di mangiare tra un pasto e l'altro.                                              | 0 | 1 | 2 | 3 | 4 | 5 | 6 |
| 8  | <b>Si è sentito/a spinto</b> a mangiare.                                                                                           | 0 | 1 | 2 | 3 | 4 | 5 | 6 |
| 9  | Ha spiluccato <b>senza pensare a quanto stava mangiando.</b>                                                                       | 0 | 1 | 2 | 3 | 4 | 5 | 6 |
| 10 | Ha mangiato <b>senza averlo programmato tra i pasti</b> e gli spuntini stabiliti.                                                  | 0 | 1 | 2 | 3 | 4 | 5 | 6 |
| 11 | <b>Si è sentito/a a turbato</b> dopo aver spiluccato.                                                                              | 0 | 1 | 2 | 3 | 4 | 5 | 6 |
| 12 | Ha spiluccato <b>quando era ansioso/a, annoiato/a, solo/a oppure quando provava altre emozioni.</b>                                | 0 | 1 | 2 | 3 | 4 | 5 | 6 |
